# Supplementary material for: Comprehensive analysis of crystal structure, spectroscopic properties, quantum chemical insights, and molecular docking studies of two pyrazolopyridine compounds: potential anticancer agents
Source: Royal Society of Chemistry journal article supplement (doi:10.1039/d3ra04874h), 2023-01-01
Supplement: d3ra04874h1.pdf [file d3ra04874h1.pdf]

Support information

## Comprehensive analysis of crystal structure, spectroscopic properties, quantum chemical insights, and molecular docking studies of two pyrazolopyridine compounds: Potential anticancer agents

Efraín Polo-Cuadrado<sup>a</sup>, Lorena López-Cuellar<sup>a,b</sup>, Karen Acosta-Quiroga<sup>c</sup>, Cristian Rojas-Peña<sup>c</sup>, Iván Brito<sup>d</sup>, Jonathan Cisterna<sup>e</sup>, Jorge Trilleras<sup>f</sup>, Joel B. Alderete<sup>g</sup>, Yorley Duarte<sup>\*h,i</sup> and Margarita Gutiérrez<sup>\*a</sup>

<sup>a</sup> Laboratorio Síntesis Orgánica y Actividad Biológica (LSO-Act-Bio), Instituto de Química de Recursos Naturales, Universidad de Talca, Casilla 747, Talca 3460000, Chile. E-mail: [mgutierrez@utalca.cl](mailto:mgutierrez@utalca.cl)

<sup>b</sup> Universidad de la Amazonia, Programa de Química, Cl. 17 Diagonal 17 con, Cra. 3F, Florencia 180001, Colombia

<sup>c</sup> Doctorado en Química, Departamento de Química Inorgánica y Analítica, Universidad de Chile, Santiago, Chile.

<sup>d</sup> Departamento de Química, Facultad de Ciencias Básicas, Universidad de Antofagasta, Avenida. Universidad de Antofagasta, Campus Coloso, Antofagasta 02800, Chile.

<sup>e</sup> Departamento de Química, Facultad de Ciencias, Universidad Católica del Norte, Sede Casa Central, Av. Angamos 0610, Antofagasta, Chile

<sup>f</sup> Grupo de Investigación en Compuestos Heterocíclicos, Universidad del Atlántico, Puerto Colombia 081007, Colombia

<sup>g</sup> Instituto de Química de Recursos Naturales (IQRN), Universidad de Talca, Avenida Lircay S/N, Casilla 747, Talca, Chile.

<sup>h</sup> Center for Bioinformatics and Integrative Biology, Facultad de Ciencias de la Vida, Universidad, Andrés Bello, Av. Republica 330, Santiago 8370146, Chile

E-mail: [yorley.duarte@unab.cl](mailto:yorley.duarte@unab.cl)

<sup>i</sup> Interdisciplinary Centre for Neuroscience of Valparaíso, Facultad de Ciencias, Universidad de Valparaíso, Valparaíso 2381850, Chile.

Table SI-1. NMR data compound **4a** (DMSO-*d*<sub>6</sub>) and **4b** (CDCl<sub>3</sub>)

| <b>4a</b>               |                             | <b>4b</b>                   |                             |
|-------------------------|-----------------------------|-----------------------------|-----------------------------|
| $\delta_C$ (ppm)        | $\delta_H$ (ppm)            | $\delta_C$ (ppm)            | $\delta_H$ (ppm)            |
| 12.2 (CH <sub>3</sub> ) | 2.59 (s)                    | 15.6 (CH <sub>3</sub> )     | 2.23 (s)                    |
| 28.5 (CH <sub>2</sub> ) | 3.23 (t, <i>J</i> = 6.3 Hz) | 28.3 (CH <sub>2</sub> )     | 3.28-3.32 (m)               |
| 36.1 (CH <sub>2</sub> ) | 2.76-2.80 (m)               | 36.8 (CH <sub>2</sub> )     | 2.77-2.80 (m)               |
| 116.9 (C)               | -                           | 40.2 (2 x CH <sub>3</sub> ) | 3.06 (s)                    |
| 120.5 (2xCH)            | 8.22 (d, <i>J</i> = 7.8 Hz) | 110.9 (2xCH)                | 7.53 (t, <i>J</i> = 8.0 Hz) |
| 125.0 (C)               | -                           | 116.0 (C)                   | -                           |
| 126.0 (CH)              | 7.35 (t, <i>J</i> = 7.4 Hz) | 119.4 (C)                   | -                           |
| 127.2 (2xCH)            | 7.57 (t, <i>J</i> = 7.9 Hz) | 121.5 (2 x CH)              | 6.81 (d, <i>J</i> = 8.0 Hz) |
| 129.2 (CH)              | 8.54 (s)                    | 121.8 (C)                   | -                           |
| 138.6 (C)               | -                           | 126.1 (CH)                  | 7.31-7.33 (m)               |
| 145.8 (C)               | -                           | 129.0 (2 x CH)              | 7.31-7.33 (m)               |
| 152.9 (C)               | -                           | 130.7 (2xCH)                | 8.25 (d, <i>J</i> = 8.0 Hz) |
| 174.6 (C)               | -                           | 139.0 (C)                   | -                           |
| 203.4. (C=O)            | -                           | 145.9 (C)                   | -                           |
|                         |                             | 147.7 (C)                   | -                           |
|                         |                             | 150.9(C)                    | -                           |
|                         |                             | 153.3 (C)                   | -                           |
|                         |                             | 175.1 (C)                   | -                           |
|                         |                             | 202.8 (C=O)                 | -                           |

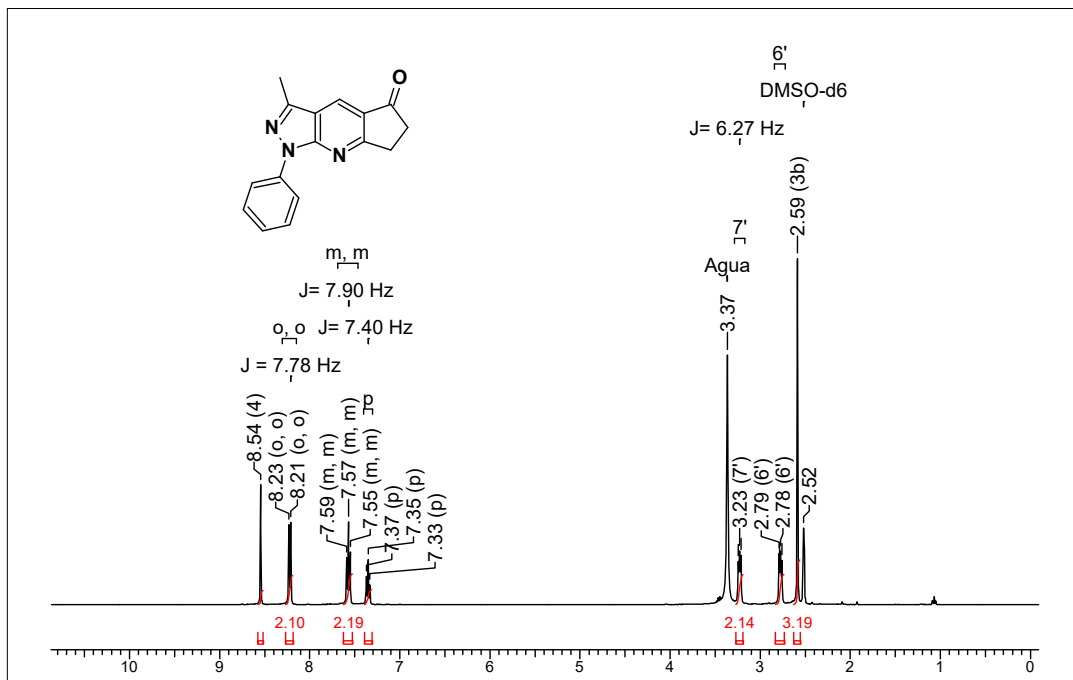

Figure SI-1. <sup>1</sup>H-NMR spectrum of compound 4a

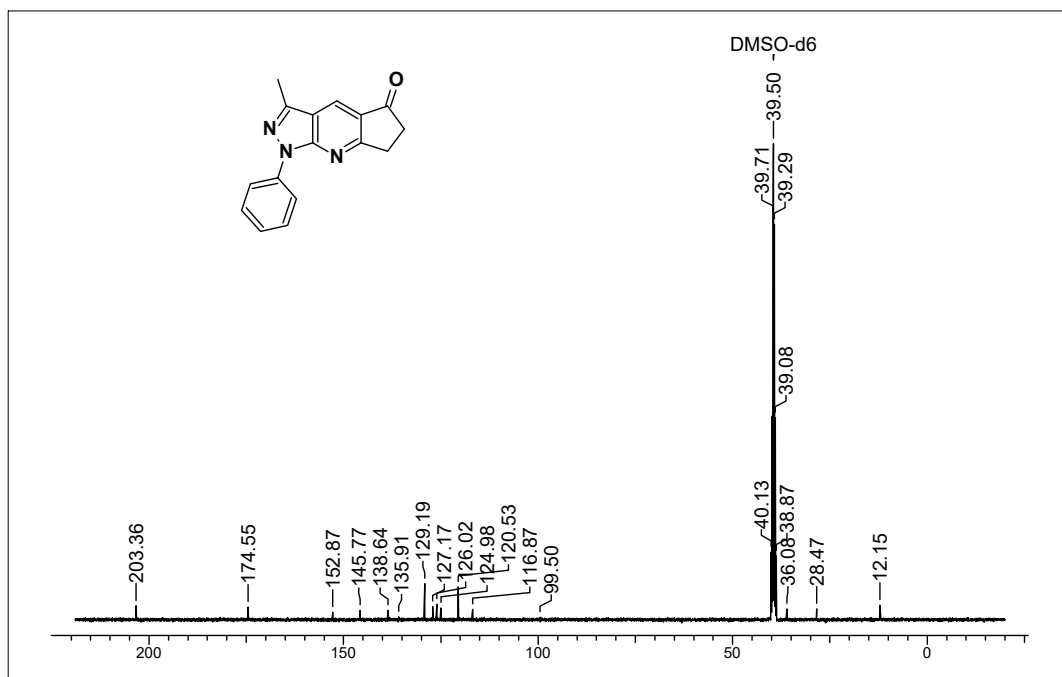

Figure SI-2. <sup>13</sup>C-NMR spectrum of compound 4a

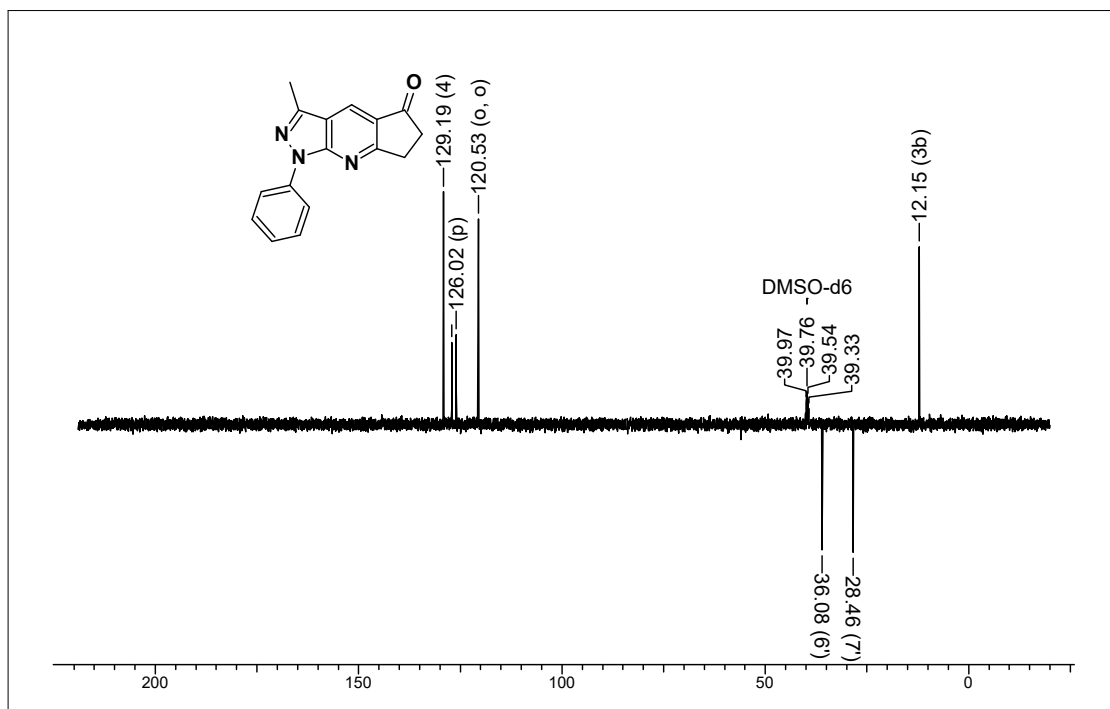

Figure SI-3. DEPT-135 spectrum of compound 4a

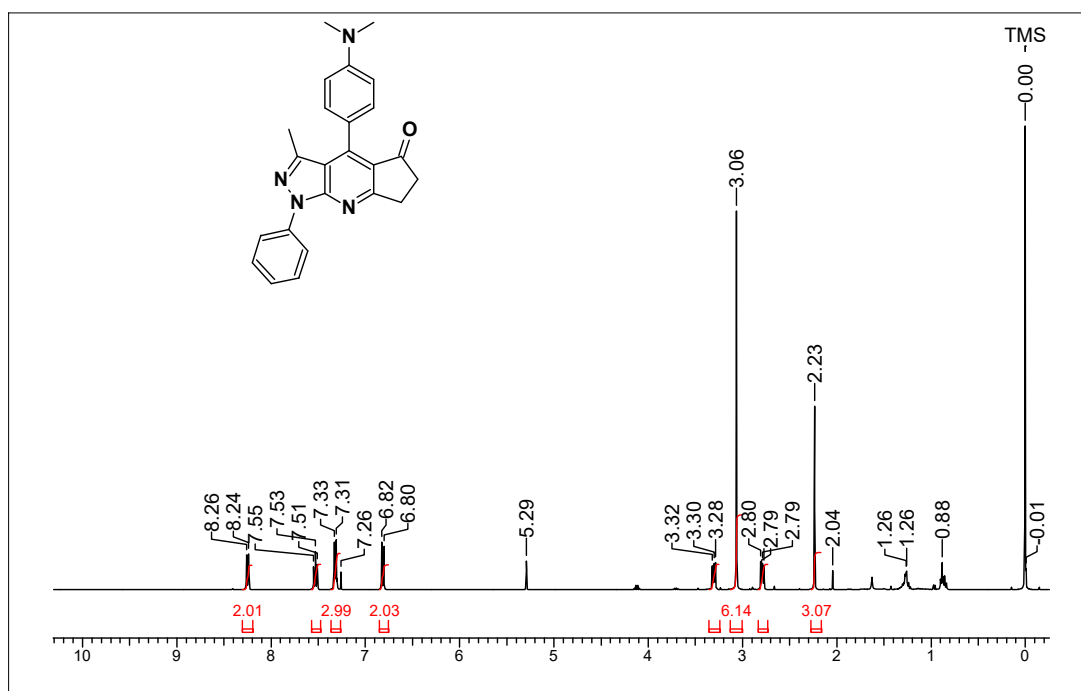

Figure SI-4. <sup>1</sup>H-NMR spectrum of compound 4b

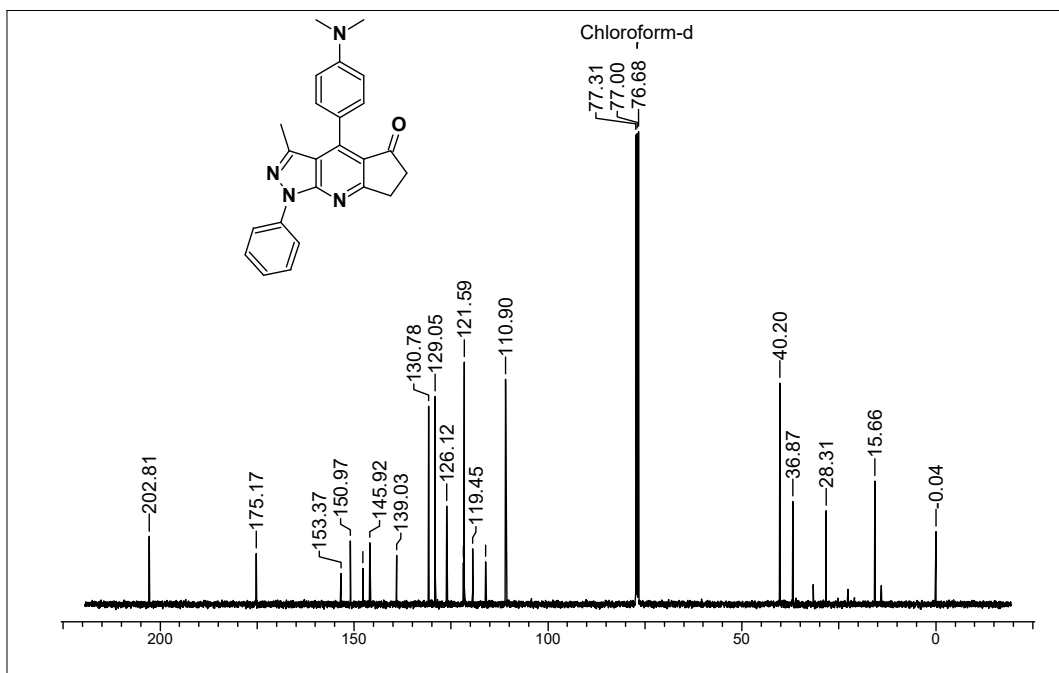

Figure SI-5. <sup>13</sup>C-NMR spectrum of compound 4b

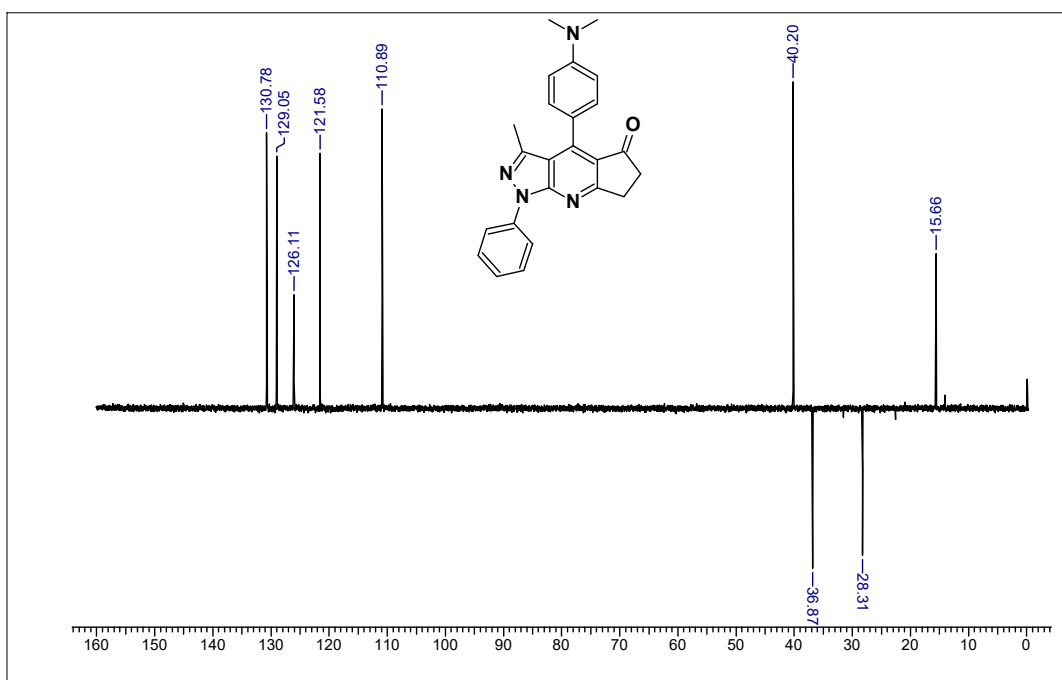

Figure SI-6. DEPT-135 spectrum of compound 4b

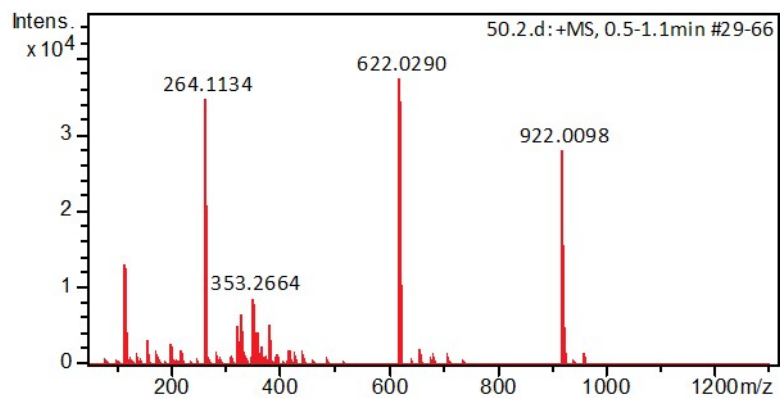

Figure SI-7. MS spectrum of compound **4a**

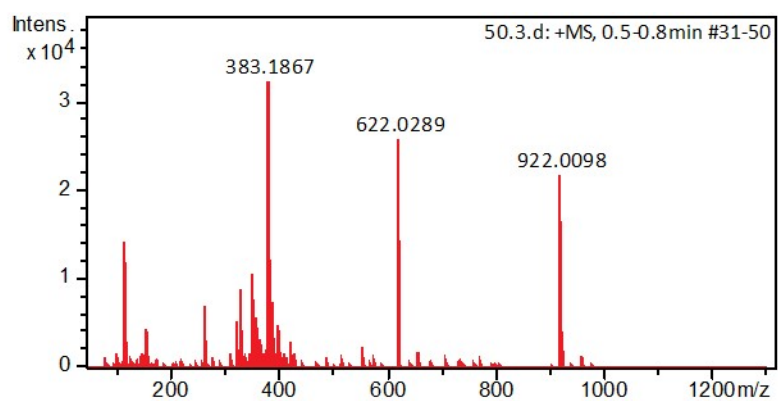

Figure SI-8. MS spectrum of compound **4b**

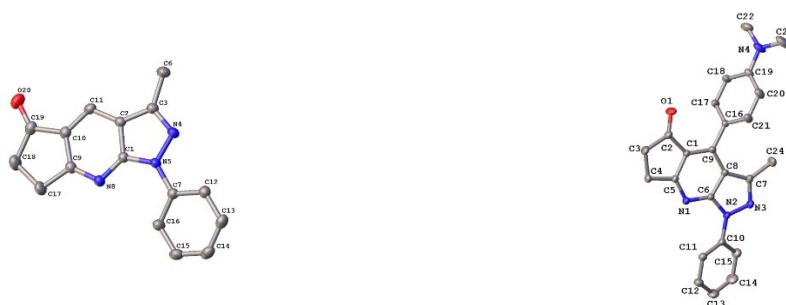

Figure SI-9. ORTEP plots of compounds **4a** (left) and **4b** (right). Thermal ellipsoids were drawn with 30% of probability. H-atoms were omitted for sake

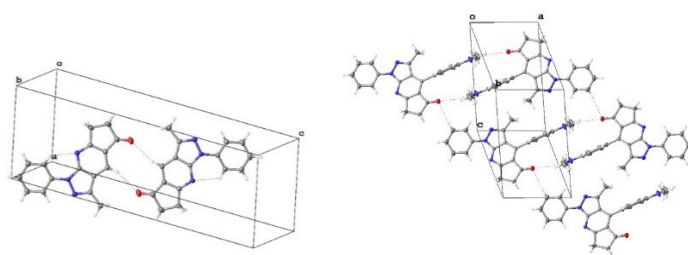

Figure SI-10. Crystal Packing of compounds **4a** (left) and **4b** (right)

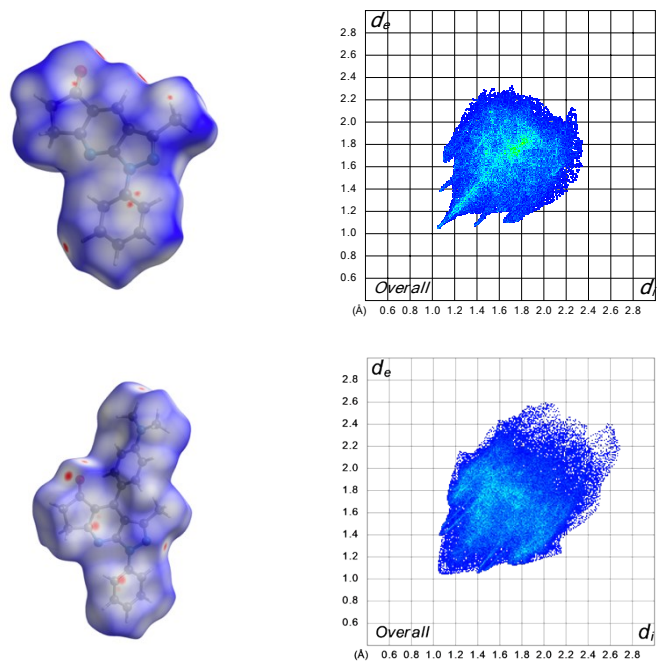

Figure SI-11. Overall Hirshfeld surface (left) for title compound and its fingerprint plot (right) for compounds **4a** (top) and **4b** (bottom)

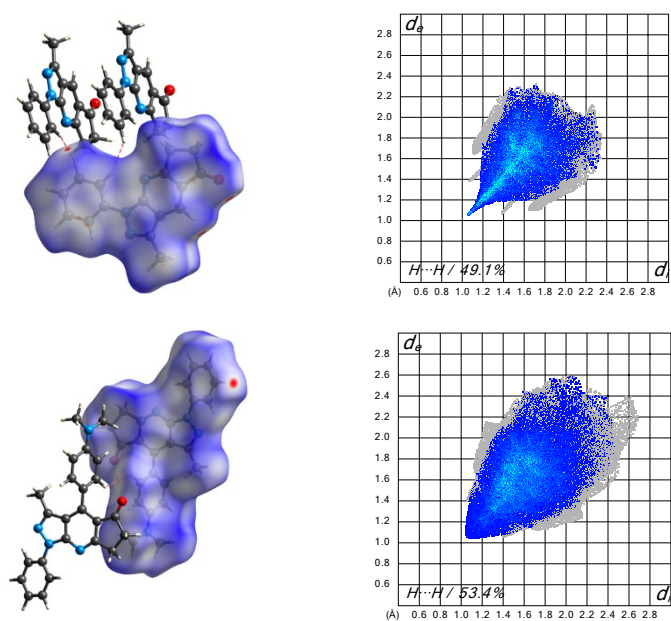

Figure SI-12. Dihydrogen bond-like interactions in compound **4a** (top) and **4b** (bottom)

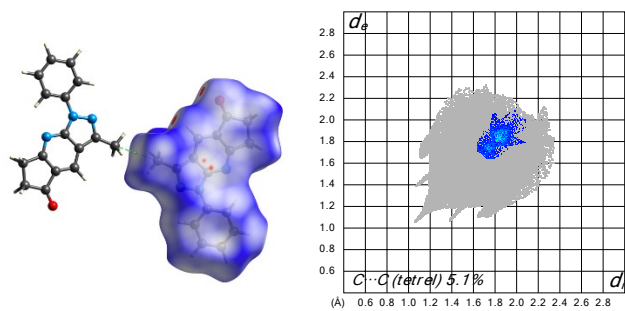

Figure SI-13. Ditetrel bond interaction in compound **4b**

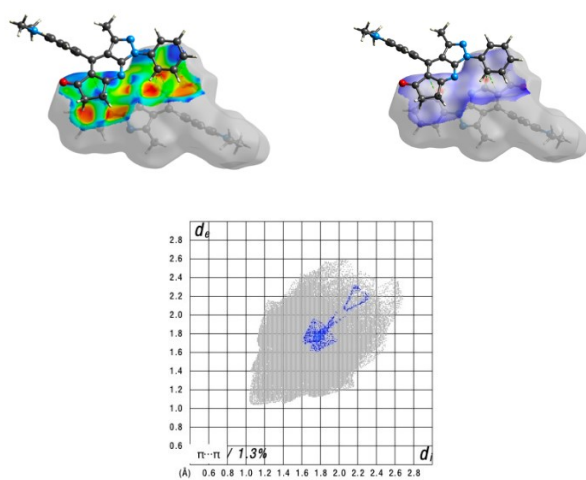

Figure SI-14. Shape index surface (left), and dnorm surface (middle) for compound **4b** and its fingerprint plot (right), showing  $\pi \cdots \pi$  stacking interactions

4a

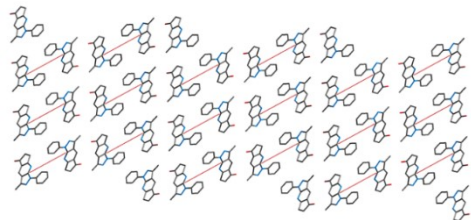

-208.0 kJ·mol<sup>-1</sup>

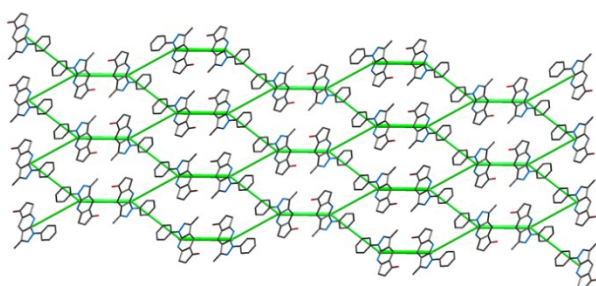

-106.3 kJ·mol<sup>-1</sup>

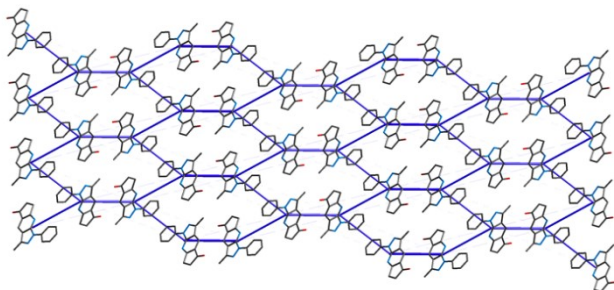

-79.2 kJ·mol<sup>-1</sup>

4b

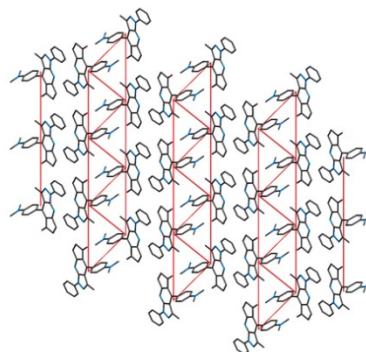

-7.2 kJ·mol<sup>-1</sup>

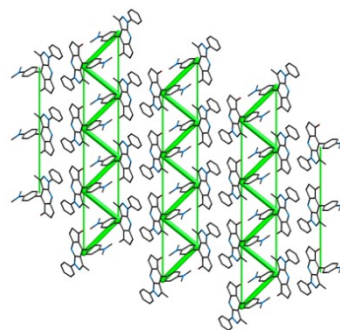

-60.2 kJ·mol<sup>-1</sup>

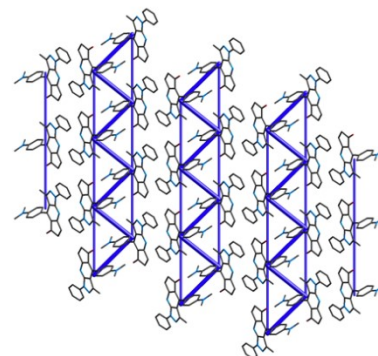

-40.6 kJ·mol<sup>-1</sup>

Figure SI-15. Energy framework of the compounds **4a** (left), and **4b** viewed along [100] direction
